# Supplementary material for: Measuring synergy within a Triple Helix innovation system using game theory: cases of some developed and emerging countries
Source: Springer Nature journal article supplement (doi:10.1186/s40604-018-0054-8), 2018-09-17
Supplement: MOESM1 [file 16131820]

**Eustache Mègnigbèto**

**Measuring synergy within a Triple Helix innovation system using game theory: cases of some developed and emerging countries**

**Multilingual abstracts**

**Arabic**

**مقياس التفاعل في نظام المراحل الثلاثة للابتكار بالاستناد على نظرية الألعاب : حالة بعض البلدان المتقدمة و الناشئة**

تعتمد الأبحاث والدراسات الحالية في قياس التفاعل في نظام المراحل الثلاثة للابتكار على استخدام المعلومات المتبادلة وقوة الإرسال وذلك بالاستناد على نظرية شانون للمعلومات. ولكن نظرا لتعقيدات نظام المراحل الثلاثة للابتكار فان العلاقات بين المراحل الثلاثة يمكن أيضا تحليلها بأساليب وأدوات متنوعة من مختلف النظريات الأخرى مثل نظرية الألعاب. لذا فإنه يمكن قياس التفاعل بمؤشرات أخرى مثل الكور وقيمة شابلي والنكليوس. يقيس الكور مدى التفاعل وتدل قيمة شابلي على نجاعة الفاعل في خلق ومتابعة التفاعل. بينما يدل النكليوس على قدرة الفاعل في الحفاظ على التفاعل. وقع تحليل نظم المراحل الثلاثة للابتكار لثمانية بلدان بالاعتماد على تحليل الإنتاج العلمي الذي يستخدم نظرية الألعاب. وتشتمل هذه البلدان على أربعة بلدان متقدمة وهي الولايات المتحدة والمملكة المتحدة وألمانيا وفرنسا وأربعة بلدان صاعدة وهي روسيا والهند والبرازيل والصين. يبدو أن أكثر المراحل إنتاجا للمعرفة لها أكبر قدرة على خلق و متابعة التفاعل كما أن الحكومة تبدي تضامنا للحفاظ على التفاعل داخل منظومة الابتكار. مستوى التفاعل هو الأعلى في البلدان المتقدمة (في مقدمتهم فرنسا 1.7-2%) مقارنة بالبلدان الصاعدة (في مقدمتهم البرازيل أقل من أو يساوى 1%) مما يؤدي إلى تقسيم هذه البلدان حسب مستوى نموها. وتبين الدراسة أن تدخل الدولة في الاقتصاد يؤثر على موقع الكور في المخطط الثلاثي

**الكلمات المفتاح: المراحل الثلاثة ; نظرية الألعاب ; الابتكار ; نظام الابتكار ; الكور ; قيمة شابلي; النكليوس**
